# Supplementary material
Source: MDPI journal article supplement (https://www.mdpi.com/1424-8247/14/11/1135)

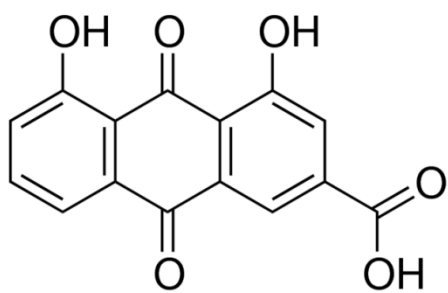

**Figure S1.** Chemical structure of rhein ( $C_{15}H_8O_6$ ).

Supplement: s1 [file s1]
